# Supplementary material for: Mixture of Peanut Skin Extract, Geniposide, and Isoquercitrin Improves the Hepatic Lipid Accumulation of Mice via Modification of Gut Microbiota Homeostasis and the TLR4 and AMPK Signaling Pathways
Source: MDPI journal article supplement (doi:10.3390/ijms242316684), 2023-11-24
Supplement: s1 [file s1]

## Supplementary information

*Article*

# Mixture of Peanut Skin Extract, Geniposide, and Isoquercitrin Improves the Hepatic Lipid Accumulation of Mice via Modification of Gut Microbiota Homeostasis and the TLR4 and AMPK Signaling Pathways

Meijuan Yi <sup>1</sup>, Opeyemi B. Fasina <sup>1</sup>, Yajing Li <sup>1</sup>, Lan Xiang <sup>1,\*</sup> and Jianhua Qi <sup>1,2,\*</sup>

<sup>1</sup> College of Pharmaceutical Science, Zhejiang University, Hangzhou 310058, China; 22119153@zju.edu.cn (M.Y.); fasinaopeyemi@zju.edu.cn (O.B.F.); 12019045@zju.edu.cn (Y.L.)

<sup>2</sup> Jinhua Institute of Zhejiang University, Jinhua 321299, China

\* Correspondence: lxiang@zju.edu.cn (L.X.); qjjianhua@zju.edu.cn (J.Q.)

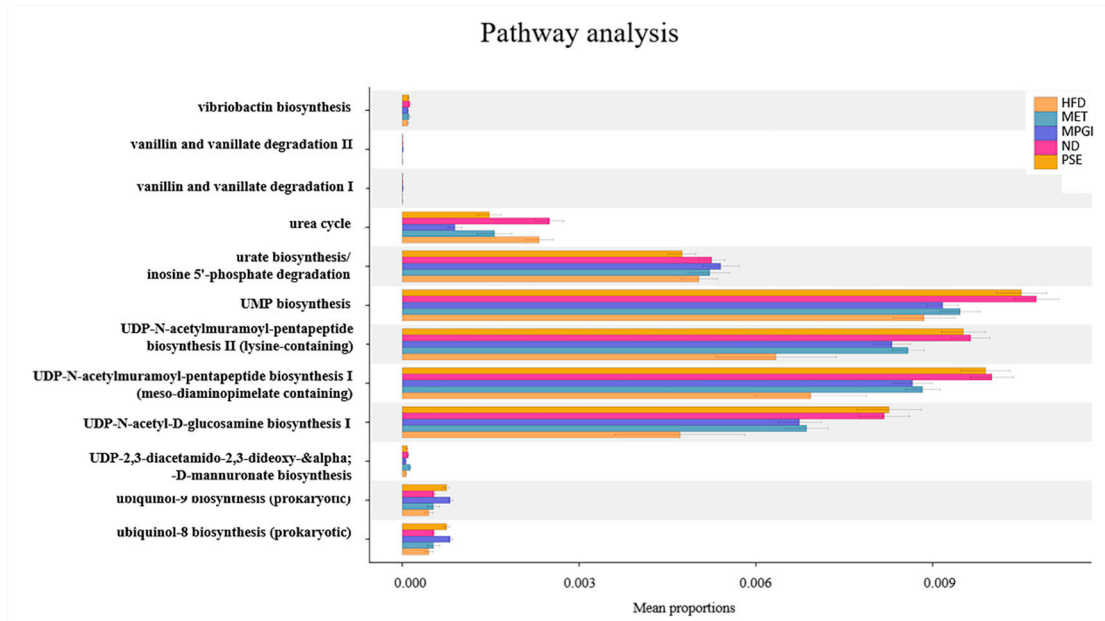

**Supplementary Figure S1.** Pathway analysis of function prediction for the gut microbiota after administrating MPGI with PICRUSt2 software.

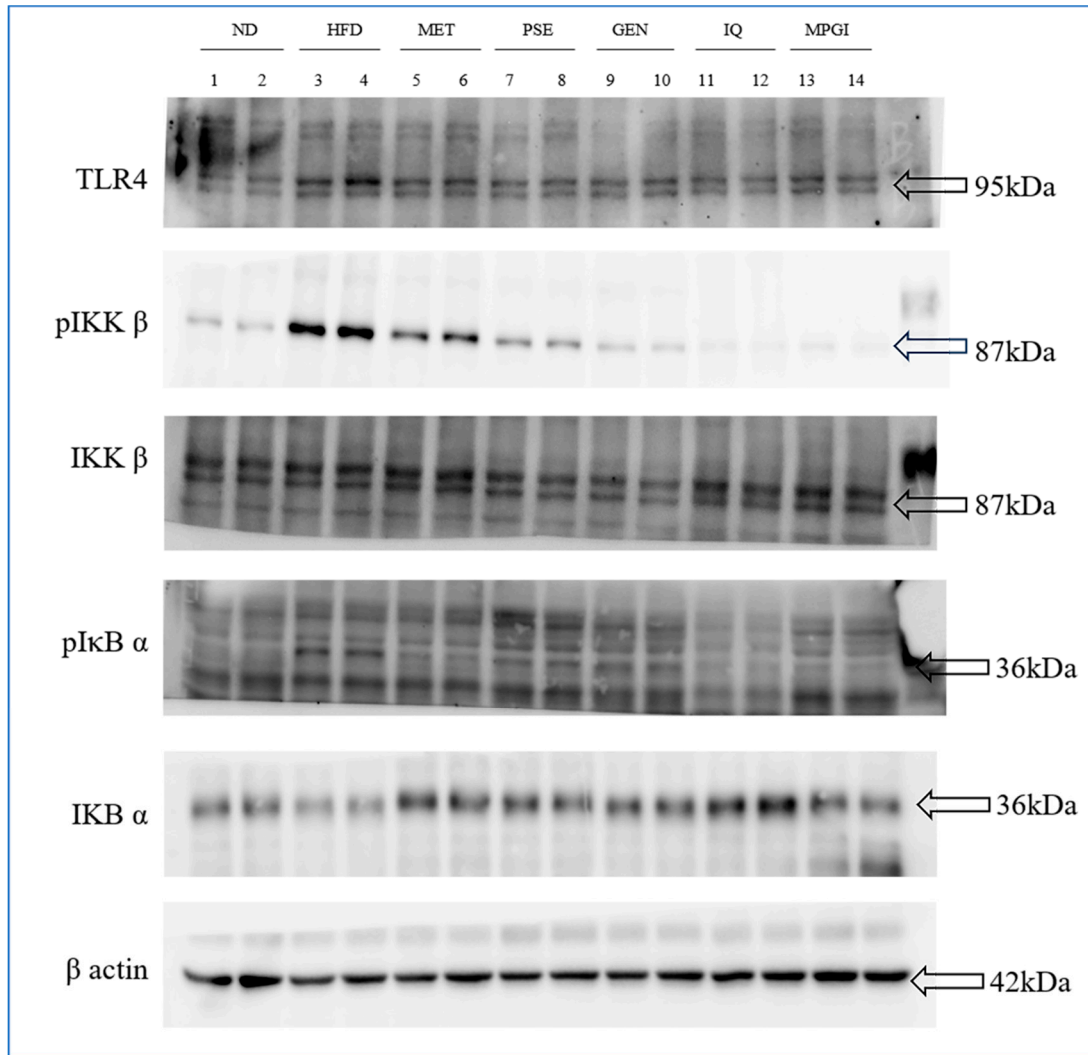

**Supplementary Figure S2. Original western blot analysis of Figure 7.** Original western blot of TLR4, pIKK  $\beta$ , IKK  $\beta$ , pI $\kappa$ B  $\alpha$ , I $\kappa$ B  $\alpha$  and  $\beta$  actin in liver of mice in Figure 7.

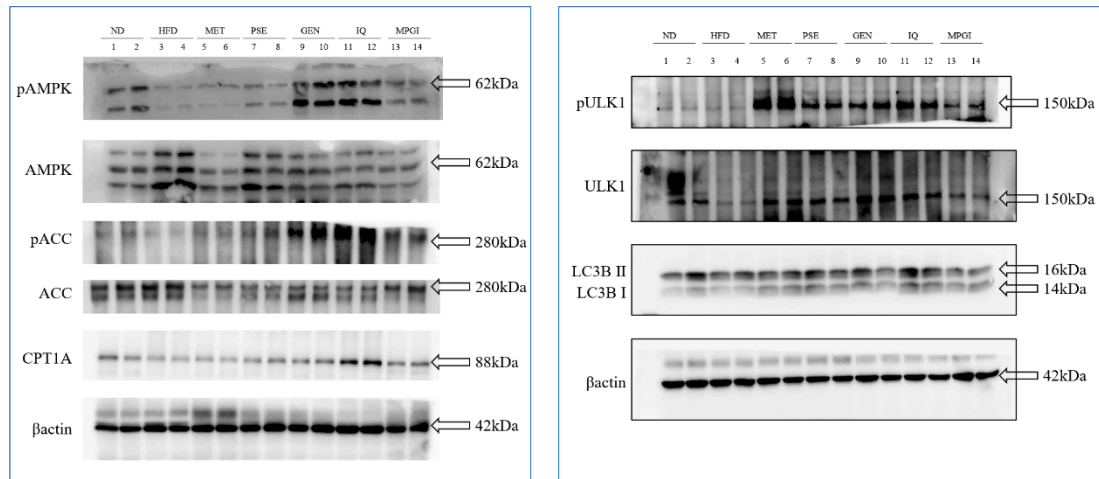

**Supplementary Figure S3. Original western blot analysis of Figure 8.** Original western blot of phosphate-AMPK, AMPK, phosphate-ACC, ACC, CPT1A and β-actin in Figure 8(A), and phosphate-ULK1, ULK1, LC3B and β-actin of in mice liver in Figure 8(B).



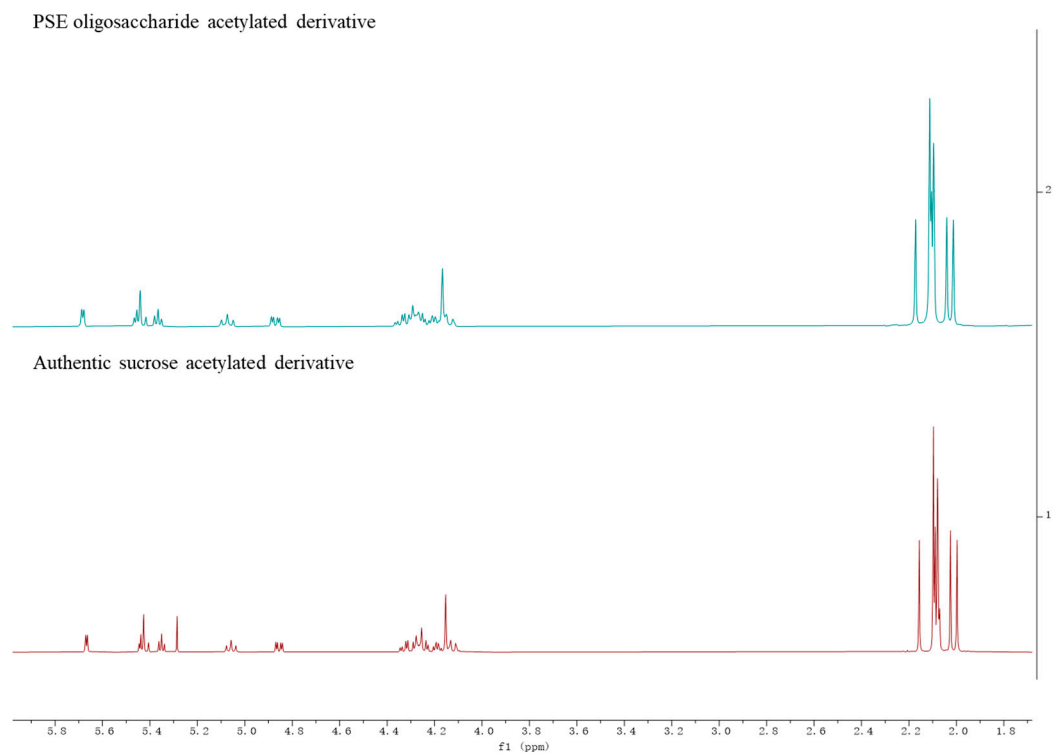

**Supplementary Figure S5. Comparison of <sup>1</sup>H NMR spectra of PSE oligosaccharide acetylated derivative with acetylated derivative of authentic sucrose.**

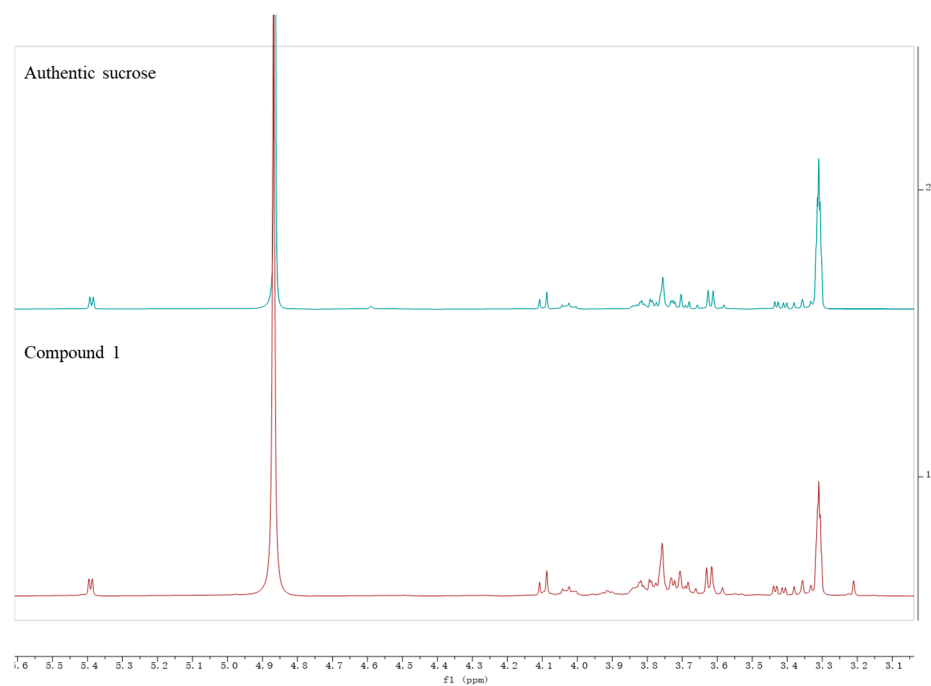

**Supplementary Figure S6. Comparison of <sup>1</sup>H NMR spectra of Compound 1 with authentic sucrose.**

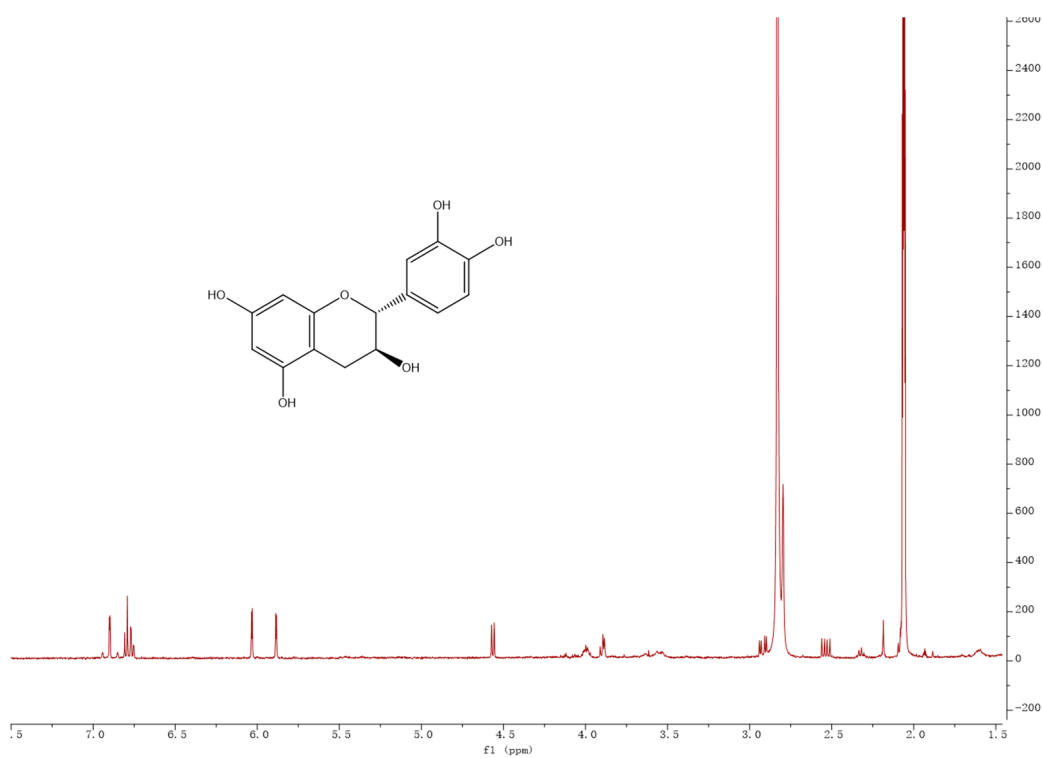

**Supplementary Figure S7. The <sup>1</sup>H NMR spectrum of compound 2.**

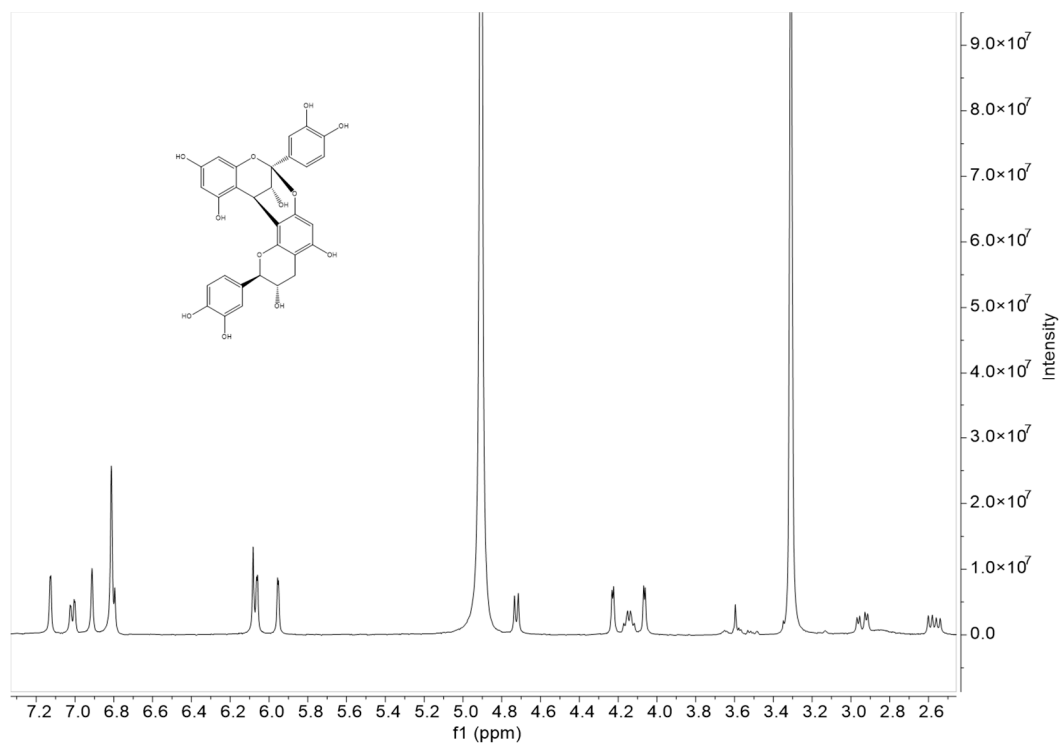

**Supplementary Figure S8. The <sup>1</sup>H NMR spectrum of compound 3**
